# Supplementary material for: The sunlight-driven photosalient effect of a 1D coordination polymer and the release of an elusive cyclobutane derivative
Source: Royal Society of Chemistry journal article supplement (doi:10.1039/c9cc06016b), 2019-01-01
Supplement: c9cc06016b3.pdf [file c9cc06016b3.pdf]

# Sunlight-driven photosalient effect of 1D coordination polymer and release of an of elusive cyclobutane derivative

Basudeb Dutta,<sup>a</sup> Chittaranjan Sinha,<sup>b</sup> and Mohammad Hedayetullah Mir\*<sup>a</sup>

<sup>a</sup>Department of Chemistry, Aliah University, New Town, Kolkata 700 156, India.

<sup>b</sup>Department of Chemistry, Jadavpur University, Jadavpur, Kolkata 700 032, India.

## Supporting Information

### Experimental Procedures

#### Materials and general method

All chemicals purchased were reagent grade and were used without further purification. Elemental analysis (carbon, hydrogen and nitrogen) was performed on a Perkin–Elmer 240C elemental analyzer. Infrared spectrum in KBr (4500–500  $\text{cm}^{-1}$ ) was recorded using a Perkin–Elmer FT-IR spectrum RX1 spectrometer. Thermogravimetric analysis was recorded on a Perkin–Elmer Pyris Diamond TG/DTA in the temperature range between 30°C and 600°C under a nitrogen atmosphere at a heating rate of 12°C  $\text{min}^{-1}$ . The PXRD data was collected on a Bruker D8 Advance X-ray diffractometer using Cu  $K\alpha$  radiation ( $\lambda = 1.548 \text{ \AA}$ ) generated at 40 kV and 40 mA. The PXRD spectrum was recorded in a  $2\theta$  range of 5–50. Photodimerization reaction was carried out using Luzchem photoreactor (8 W UVA lamps) at ~350 nm for 2 hrs at room temperature. Morphology and energy-dispersive X-ray spectroscopy (EDS) analyses of compound **1** before and after UV irradiation were performed via field emission scanning electron microscopy (FESEM; JEOL, JSM-6700F). The ESI–MS spectrum was recorded on a Water HRMS model XEVO-G2QTOF#YCA351 spectrometer.

#### Synthesis of the compounds

Synthesis of **1**: A solution of 4-nvp (0.046 g, 0.2 mmol) in MeOH (2 mL) was slowly and carefully layered onto a solution of  $\text{Zn}(\text{NO}_3)_2 \cdot 6\text{H}_2\text{O}$  (0.06 g, 0.2 mmol), in  $\text{H}_2\text{O}$  (2 mL) using a 2 mL 1 : 1 (

= v/v) buffer solution of MeOH and H<sub>2</sub>O followed by layering of H<sub>2</sub>glu (0.026 g, 0.2 mmol) neutralized with Et<sub>3</sub>N (0.042 g, 0.4 mmol) in 2 mL EtOH. The yellow color needle shaped crystals of {[Zn(glu)(4-nvp)]}<sub>n</sub>, (**1**) were obtained after three days (0.056 g, yield 65%). Elemental analysis (%) calcd for C<sub>22</sub>H<sub>19</sub>NO<sub>4</sub>Zn: C 61.91, H 4.49, N 3.28; found: C 61.60, H 4.51, N 3.33. <sup>1</sup>H NMR (400 MHz, DMSO, TMS): δ 8.58 (d, 2H, py-H), 8.45 (d, 1H, naphthalene-H), 8.36 (d, 1H, CH=CH), 7.95 (m, 3H, naphthalene-H), 7.74 (d, 2H, py-H), 7.59 (m, 3H, naphthalene-H), 7.30 (d, 1H, CH=CH).

UV Irradiation of **1**: Colourless needle-like single crystals of **1** (0.071 g, 0.1 mmol) were irradiated using a UV-lamp (LZC-UVA; Luzchem) centred at ~350 nm wavelength for 2 h to obtain photodimerized product in almost quantitative yield. <sup>1</sup>H NMR (400 MHz, DMSO, TMS): 8.27 (d, 1H, naphthalene-H), δ 8.08 (d, 2H, py-H), 7.77 (m, 2H, naphthalene-H), 7.68 (m, 1H, naphthalene-H), 7.44 (m, 3H, naphthalene-H), 7.26 (d, 2H, py-H), 5.18 (s, 2H, CH–CH).

Synthesis of **2**: The powder residue (obtained by UV irradiation of **1** for 2 h) was dissolved in ethanol and kept for slow evaporation. Colourless needle shaped crystals of C<sub>71</sub>H<sub>60</sub>N<sub>4</sub>O, **2** were appeared after few days (yield 55%). <sup>1</sup>H NMR (400 MHz, DMSO, TMS): 8.28 (d, 1H, naphthalene-H), δ 8.07 (d, 2H, py-H), 7.78 (m, 2H, naphthalene-H), 7.68 (m, 1H, naphthalene-H), 7.47 (m, 3H, naphthalene-H), 7.26 (d, 2H, py-H), 5.18 (s, 2H, CH–CH).

### General X-ray Crystallography

Single crystals of **1** and **2** having suitable dimensions, were used for data collection using a Bruker SMART APEX II diffractometer equipped with graphite-monochromated MoK<sub>α</sub> radiation (λ, 0.71073 Å). The crystal structure was solved using the SHELXT 2014/4 structure solution program package.<sup>1</sup> Non-hydrogen atoms were refined with anisotropic thermal parameters. Hydrogen atoms were placed in their geometrically idealized positions and constrained to ride on their parent atoms. CCDC 1911202-1911203 contain the supplementary crystallographic data for this paper.

Crystal data of **1**: Triclinic space group  $P\bar{1}$ ,  $a = 7.8987(7)$ ,  $b = 11.2682(10)$ ,  $c = 11.2825(10)$  Å,  $\alpha = 74.239(3)$ ,  $\beta = 70.908(3)$ ,  $\gamma = 87.139(3)$ ,  $V = 912.44(14)$  Å<sup>3</sup>,  $Z = 2$ ,  $\rho_{\text{calcd}} = 1.553$  g.cm<sup>-3</sup>,  $\mu = 1.375$  mm<sup>-1</sup>,  $T = 296$  K,  $R1 = 0.0473$ ,  $wR2 = 0.1280$  with  $I > 2\sigma(I)$ , GOF = 0.968.

Crystal data of **2**: Monoclinic space group  $P2_1/C$ ,  $a = 13.8251(15)$ ,  $b = 15.8177(18)$ ,  $c = 13.4161(15)$  Å,  $\beta = 112.749(3)$ ,  $V = 2705.6(5)$  Å<sup>3</sup>,  $Z = 2$ ,  $\rho_{\text{calcd}} = 1.209$  g.cm<sup>-3</sup>,  $\mu = 0.071$  mm<sup>-1</sup>,  $T = 296$  K,  $R1 = 0.0673$ ,  $wR2 = 0.1918$  with  $I > 2\sigma(I)$ , GOF = 1.133.

Crystal data of **1'**: Triclinic space group  $P\bar{1}$ ,  $a = 14.061(4)$ ,  $b = 13.654(4)$ ,  $c = 16.597(4)$  Å,  $\alpha = 72.172(18)$ ,  $\beta = 79.890(18)$ ,  $\gamma = 68.482(18)$ ,  $V = 2814.8(14)$  Å<sup>3</sup>,  $Z = 2$ .

It is to be mentioned that only cell parameters and space group of **1'** can be reported with confidence because of the poor quality of single crystal data.

## Results and Discussion

**Table S1.** Selected bond lengths and bond angles in **1**

|                      |           |                      |            |
|----------------------|-----------|----------------------|------------|
| Zn(1) - O(1)         | 2.026(2)  | C(22)-O(3) - Zn(1)d  | 125.52(18) |
| Zn(1) - N(1)         | 2.039(2)  | C(22)-O(4) - Zn(1)b  | 128.48(19) |
| Zn(1) - O(4)a        | 2.050(2)  | Zn(1) - N(1) - C(1)  | 118.22(19) |
| Zn(1) - O(2)c        | 2.048(2)  | Zn(1) - N(1) - C(5)  | 123.51(18) |
| Zn(1) - O(3)d        | 2.053(2)  | C(18)-O(2) - Zn(1)c  | 124.65(17) |
| O(1) - Zn(1) - N(1)  | 100.12(9) | Zn(1)- O(1) - C(18)  | 129.82(17) |
| O(1) - Zn(1) - O(4)a | 91.55(9)  | O(2)c -Zn(1) - O(3)d | 85.88(9)   |
| O(1) - Zn(1) - O(2)c | 159.55(8) | O(4)a- Zn(1) - O(3)d | 159.89(8)  |
| O(1) - Zn(1) - O(3)d | 87.49(9)  | O(4)a- Zn(1) - O(2)c | 88.13(9)   |
| N(1) - Zn(1) - O(4)a | 101.80(9) | N(1)- Zn(1) - O(3)d  | 98.14(9)   |
| N(1) - Zn(1) - O(2)c | 99.96(8)  |                      |            |

Symmetry Code: a = -1+x, y, z; b = 1+x, y, z; c = -x, 2-y, 2-z; d = 1-x, 2-y, 2-z

**Table S2.** Selected bond lengths and bond angles in **2**

|                  |          |                  |            |
|------------------|----------|------------------|------------|
| N(1) - C(1)      | 1.314(6) | N(1)-C(1) - C(2) | 124.7(3)   |
| N(1) - C(5)      | 1.325(4) | C(1)-C(2)-C(3)   | 119.4(3)   |
| N(2) - C(18)     | 1.330(5) | N(1)-C(5)-C(4)   | 124.0(3)   |
| N(2) - C(22)     | 1.326(5) | C(2)-C(3)-C(4)   | 115.9(2)   |
| C(1) - C(2)      | 1.384(5) | C(2)-C(3)-C(6)   | 121.0(2)   |
| C(2) - C(3)      | 1.384(3) | C(4)-C(3)-C(6)   | 123.1(2)   |
| C(3)-C(4)        | 1.377(3) | C(3)-C(4)-C(5)   | 120.3(2)   |
| C(3)-C(6)        | 1.501(3) | C(3)-C(6)-C(7)   | 119.1(2)   |
| C(1)-N(1)-C(5)   | 115.7(3) | C(3)-C(6)-C(24)  | 119.06(19) |
| C(18)-N(2)-C(22) | 115.7(3) | C(7)-C(6)-C(24)  | 88.79(17)  |

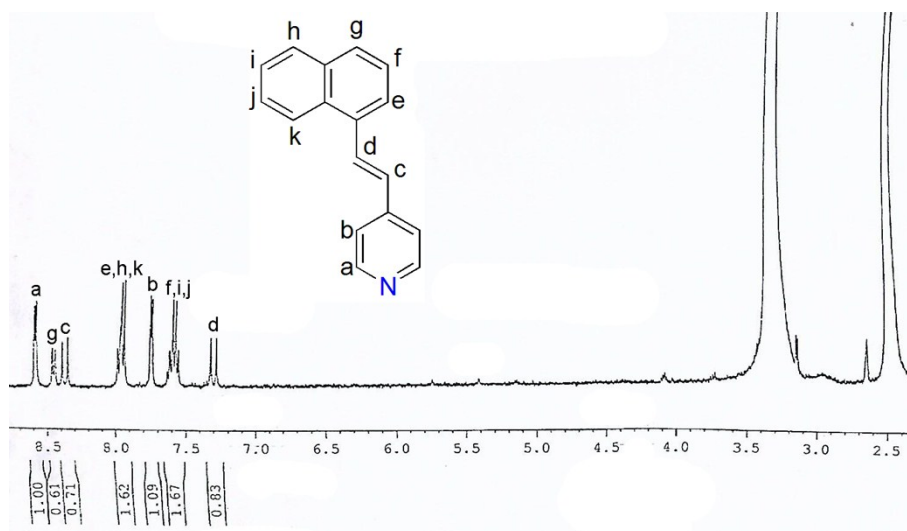

**Fig. S1.** <sup>1</sup>H NMR spectrum of **1** in d<sub>6</sub>-DMSO.

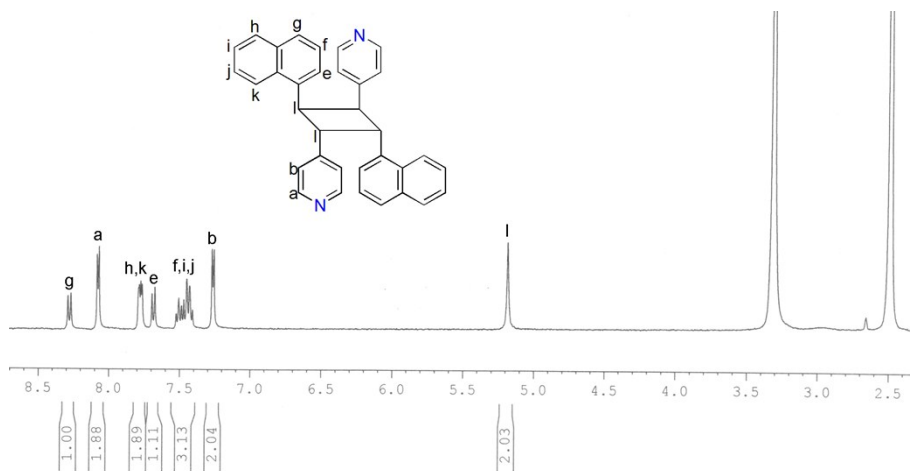

**Fig. S2.**  $^1\text{H}$  NMR spectrum of UV irradiated **1** in  $\text{d}_6$ -DMSO.

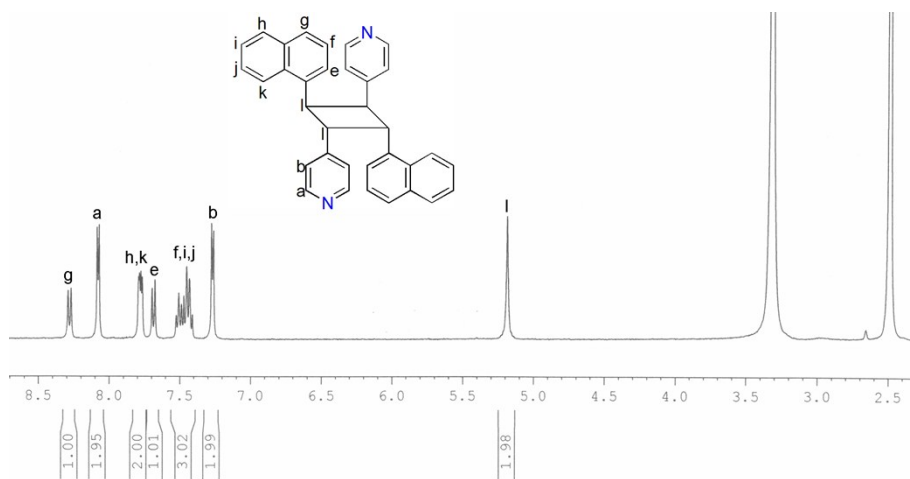

**Fig. S3.**  $^1\text{H}$  NMR spectrum of sunlight irradiated **1** in  $\text{d}_6$ -DMSO.

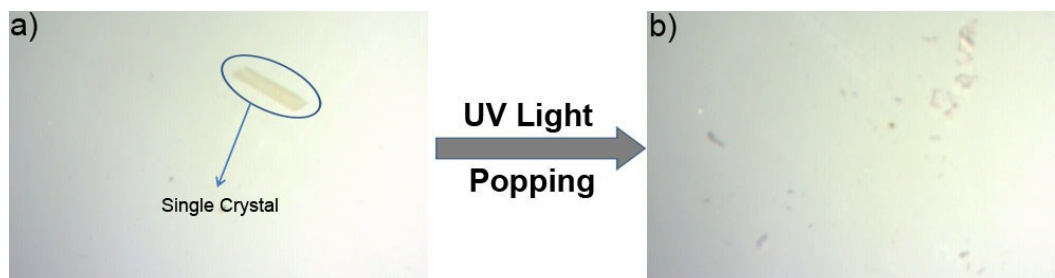

**Fig. S4.** Optical microscopic picture of a single crystal of compound **1** a) before and b) after UV irradiation.

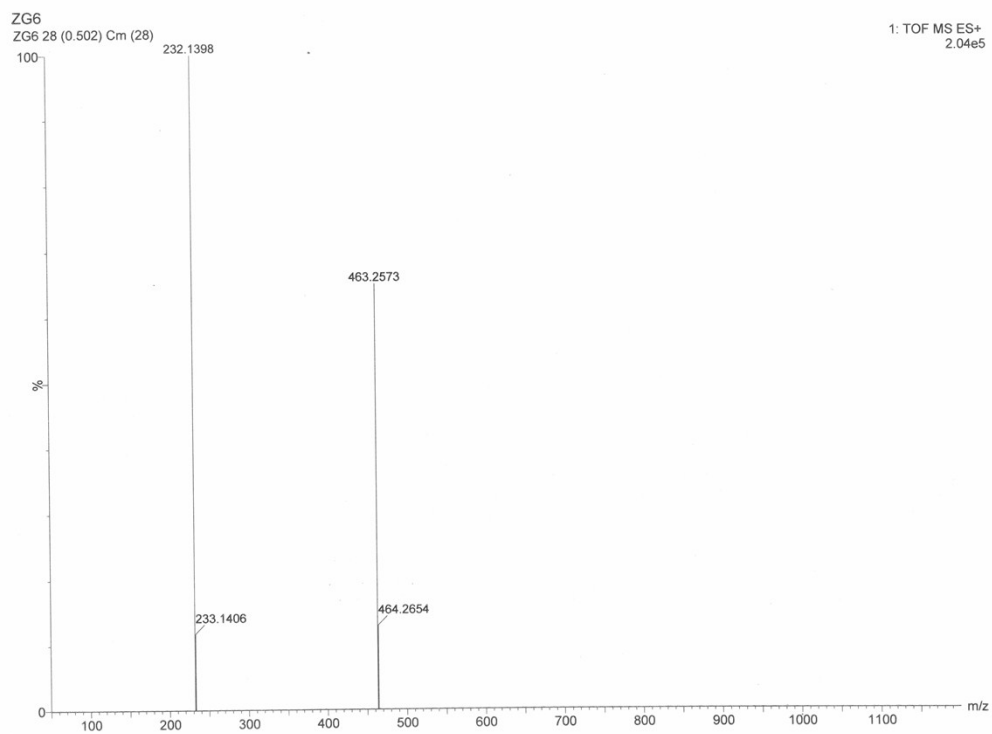

**Fig. S5.** ESI-MS spectrum of photoirradiated **1**.

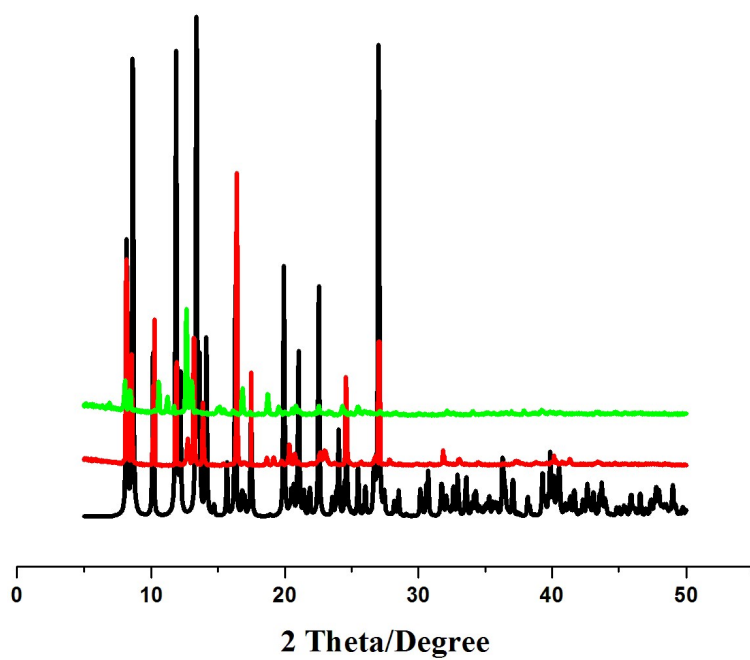

**Fig. S6.** PXRD patterns of simulated **1** (black), as-synthesized **1** (red) and photoirradiated **1** (green).

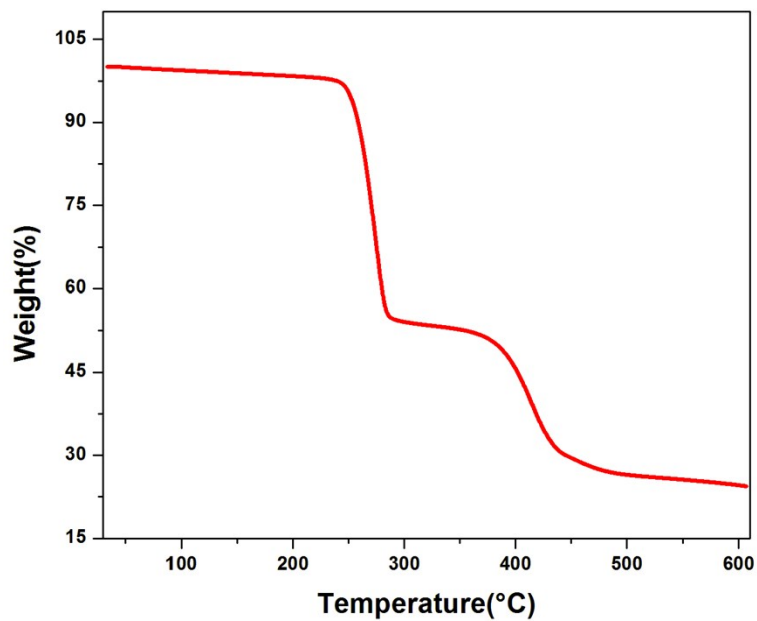

**Fig. S7.** TGA plot of **1** at N<sub>2</sub> atmosphere.

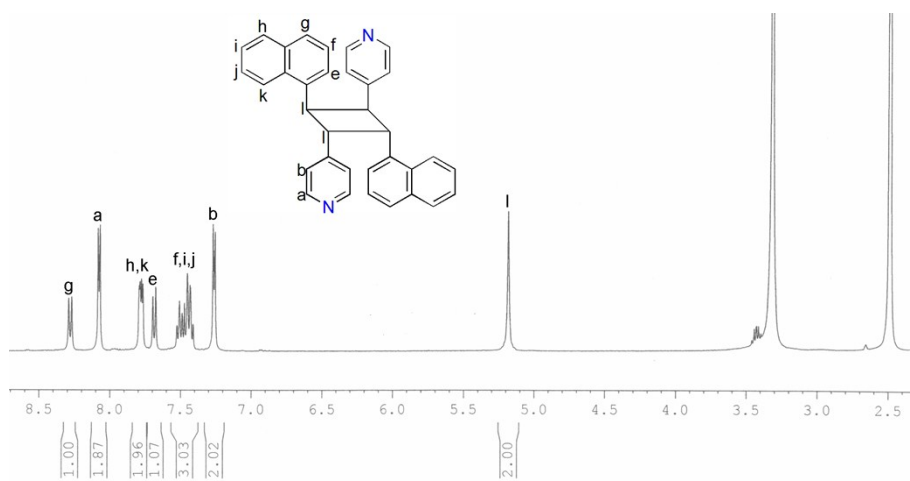

**Fig. S8.** <sup>1</sup>H NMR spectrum of **2** in d<sub>6</sub>-DMSO.

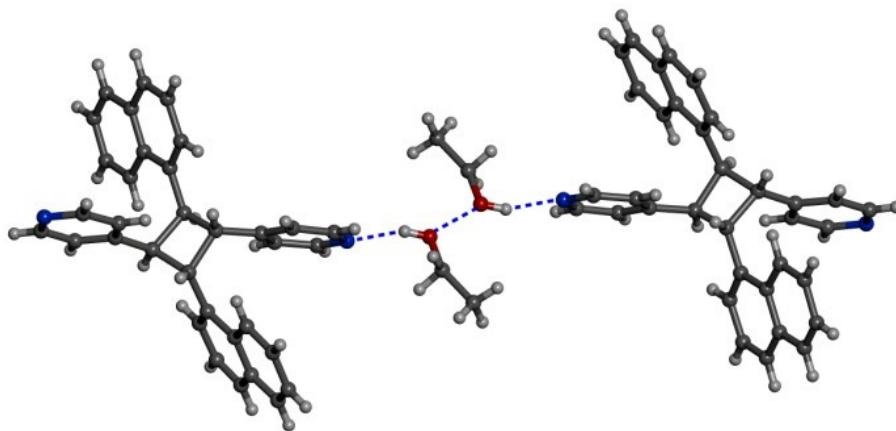

**Fig. S9.** Formation of ethanol dimer in **2**.

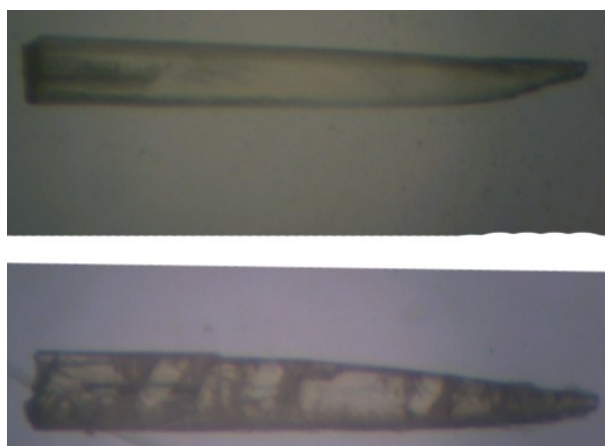

**Fig. S10.** Cracking of the crystal of **1** in paratone oil.

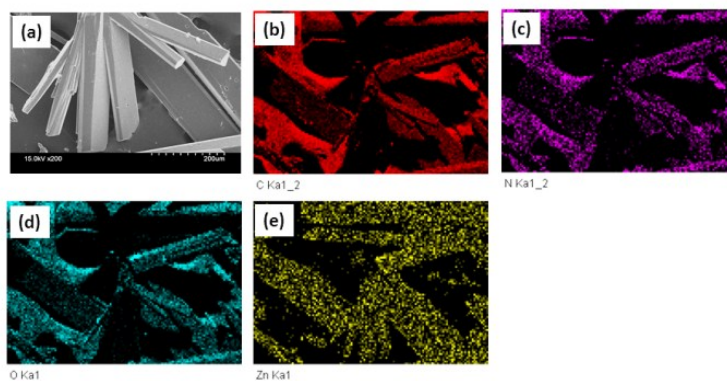

**Fig. S11.** (a) FESEM image of compound **1**. (b, c, d and e) EDS mapping of **1**.



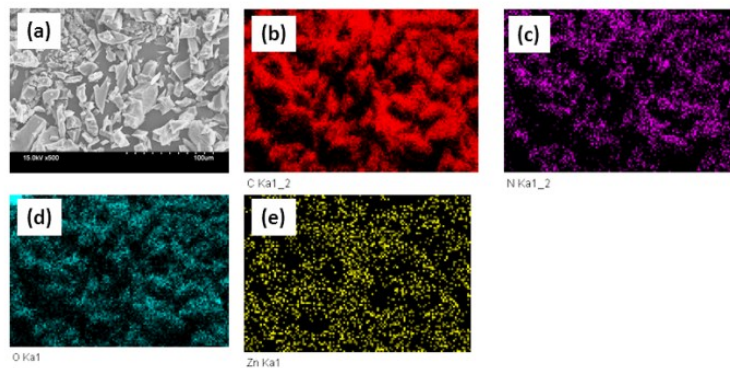

**Fig. S12.** FESEM image of **1** after UV irradiation. (b, c, d and e) EDS mapping of **1** after UV irradiation.

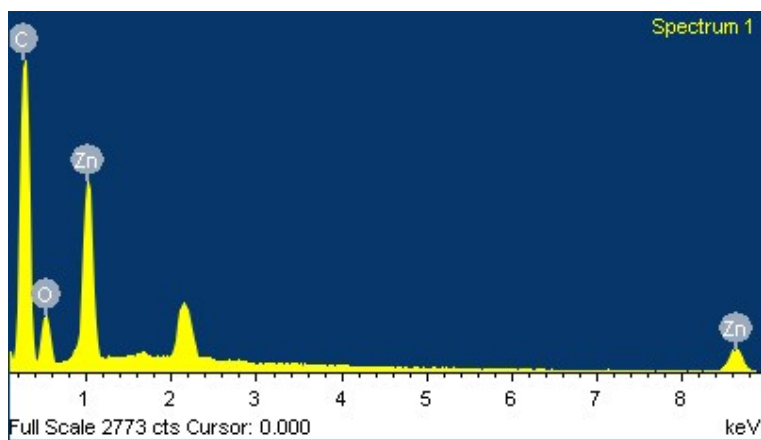

**Fig. S13.** EDS spectrum of compound **1**.

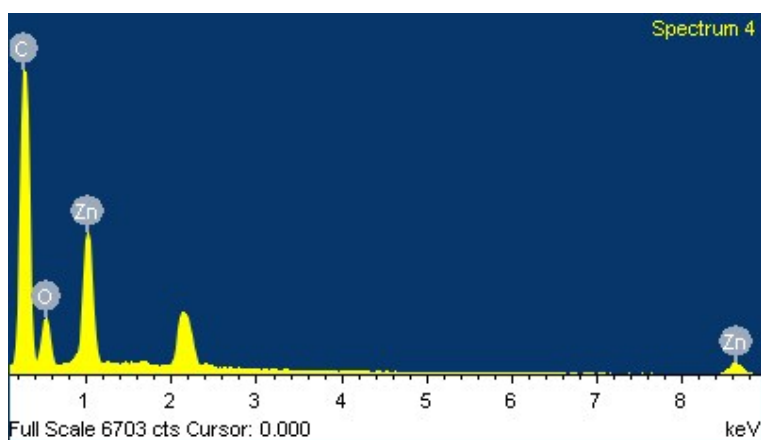

**Fig. S14.** EDS spectrum of compound **1** after UV irradiation.

**Table S3.** Elemental analysis for compound **1**

| Element | Weight% | Atomic% |
|---------|---------|---------|
| C K     | 61.60   | 79.27   |
| O K     | 15.97   | 15.43   |
| Zn L    | 22.43   | 5.30    |
| Totals  | 100.00  |         |

**Table S4.** Elemental analysis for compound **1** after UV irradiation

| Element | Weight% | Atomic% |
|---------|---------|---------|
| C K     | 63.24   | 79.17   |
| O K     | 17.43   | 16.38   |
| Zn L    | 19.33   | 4.45    |
| Totals  | 100.00  |         |

**Table S5.** Unit cell data of **1**, **2** and **1'**.

| Unit cell parameters  | Crystal 1   | Crystal 2   | Crystal 1' |
|-----------------------|-------------|-------------|------------|
| $a$ (Å)               | 7.8987(7)   | 13.8251(15) | 14.061(4)  |
| $b$ (Å)               | 11.2682(10) | 15.8177(18) | 13.654(4)  |
| $c$ (Å)               | 11.2825(10) | 13.4161(15) | 16.597(4)  |
| $\alpha$ (°)          | 74.239(3)   | 90          | 72.172(18) |
| $\beta$ (°)           | 70.908(3)   | 112.749(3)  | 79.890(18) |
| $\gamma$ (°)          | 87.139(3)   | 90          | 68.482(18) |
| $V$ (Å <sup>3</sup> ) | 912.44(14)  | 2705.6(5)   | 2814.8(14) |

## References

- (1) G. M. Sheldrick, *Acta Cryst. A*, **2015**, *71*, 3-8.
